# Supplementary material for: Pharmacologic Treatment of Obesity in adults and its impact on comorbidities: 2024 Update and Position Statement of Specialists from the Brazilian Association for the Study of Obesity and Metabolic Syndrome (Abeso) and the Brazilian Society of Endocrinology and Metabolism (SBEM)
Source: PubMed Central journal article supplement (PMC11634287; doi:10.20945/2359-4292-2024-0422), 2024-11-25
Supplement: 2359-4292-aem-68-e240422-suppl01.pdf [file 2359-4292-aem-68-e240422-suppl01.pdf]

Chart 1 displays a color map summarizing the main effects of medications approved for treating obesity. It is important to note that the color map represents the authors' opinions in this document regarding the available evidence and does not adhere to any specific degree of recommendation or level of evidence.

**Chart 1.** Summary of the main effects of medications approved for the treatment of obesity in Brazil

|                                | <b>Sibutramine<br/>10-15 mg/day</b> | <b>Orlistat 120 mg<br/>3 x/day</b> | <b>Liraglutide<br/>3.0 mg/day</b> | <b>Semaglutide<br/>2.4 mg/wk</b> | <b>**Tirzepatide<br/>10 and 15 mg/<br/>week</b> | <b>Naltrexone/<br/>bupropion<br/>32/360 mg/day</b> |
|--------------------------------|-------------------------------------|------------------------------------|-----------------------------------|----------------------------------|-------------------------------------------------|----------------------------------------------------|
| <b>Prediabetes</b>             | Light blue                          | Dark green                         | Dark green                        | Dark green                       | Dark green                                      | Light blue                                         |
| <b>T2DM (glycemic control)</b> | Dark green                          | Dark green                         | Dark green                        | Dark green                       | Dark green                                      | Dark green                                         |
| <b>Lipid profile</b>           | Dark green                          | Dark green                         | Dark green                        | Dark green                       | Dark green                                      | Dark green                                         |
| <b>BP</b>                      | Yellow                              | Dark green                         | Dark green                        | Dark green                       | Dark green                                      | Yellow                                             |
| <b>OSAS</b>                    | Light green                         | Light green                        | Dark green                        | Light blue                       | Dark green                                      | Light blue                                         |
| <b>PCOS</b>                    | Light green                         | Dark green                         | Light green                       | Light green                      | Light blue                                      | Light blue                                         |
| <b>Male hypogonadism</b>       | Light green                         | Light blue                         | Light green                       | Light blue                       | Light blue                                      | Light blue                                         |
| <b>MASLD</b>                   | Light green                         | Light green                        | Dark green                        | Dark green                       | Dark green                                      | Light green                                        |
| <b>Osteoarticular diseases</b> | Light blue                          | Dark green                         | Light blue                        | Dark green                       | Light blue                                      | Light blue                                         |
| <b>CKD</b>                     | Light blue                          | Light blue                         | Light green                       | Dark green                       | Light green                                     | Light blue                                         |
| <b>CVD*</b>                    | Red                                 | Light blue                         | Light blue                        | Dark green                       | RCT in progress                                 | RCT in progress                                    |
| <b>HF</b>                      | Red                                 | Light blue                         | Light blue                        | Dark green                       | Light blue                                      | Light blue                                         |
| <b>Quality of life</b>         | Dark green                          | Dark green                         | Dark green                        | Dark green                       | Dark green                                      | Dark green                                         |

Dark green: well-designed clinical trials or high-quality systematic reviews/meta-analyses of clinical trials.

Light green: clinical trials with few participants, observational design, or low statistical power.

Yellow: clinical trials with adverse events that deserve attention/caution.

Red: clinical trials with evidence of risk for patients at high cardiovascular risk.

Blue: no studies available on the topic or studies with neutral results (no benefits demonstrated).

T2DM: type 2 diabetes mellitus; BP: blood pressure; OSAS: obstructive sleep apnea syndrome; PCOS: polycystic ovary syndrome; MASLD: metabolic dysfunction-associated steatotic liver disease; CKD: chronic kidney disease; CVD: cardiovascular disease; RCT: randomized clinical trial; HF: heart failure.

\* For cardiovascular diseases, only randomized clinical trials designed specifically to assess safety and/or superiority in cardiovascular outcomes were considered.

Prepared according to the authors' opinions.

\*\*As of July 2024, tirzepatide was not yet approved for the treatment of obesity in Brazil. Up to this date, the medication was ONLY approved to treat type 2 diabetes mellitus.
